# Supplementary material for: GWAS on the Attack by Aspen Borer Saperda calcarata on Black Cottonwood Trees Reveals a Response Mechanism Involving Secondary Metabolism and Independence of Tree Architecture
Source: MDPI journal article supplement (doi:10.3390/f14061129), 2023-05-30
Supplement: s1 [file s1]

Archive with 1 entries (1 files):
- forests-2367872-supplementary.pdf
