# Supplementary material for: GWAS on the Attack by Aspen Borer Saperda calcarata on Black Cottonwood Trees Reveals a Response Mechanism Involving Secondary Metabolism and Independence of Tree Architecture
Source: MDPI journal article supplement (doi:10.3390/f14061129), 2023-05-30
Supplement: s1 [file s1 › forests-2367872-supplementary.pdf]

## Supplementary material

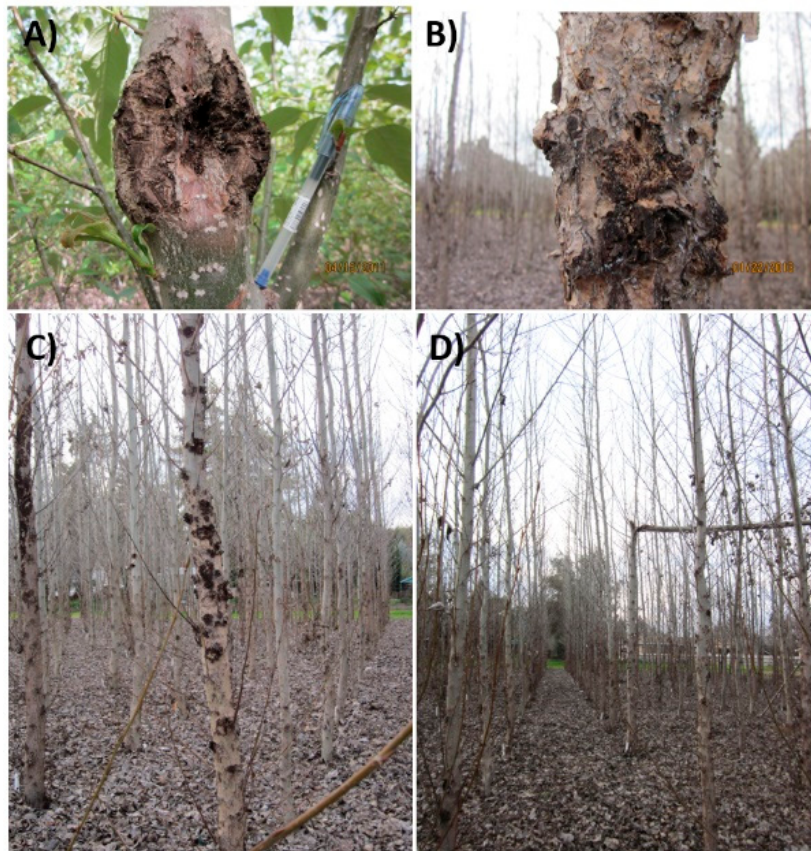

**Figure S1.** Damage produced by *S. calcarata* in the assessed *P. trichocarpa* trees. A) Swelling around larvae galleries. B) Stem with the typical effect of galleries on the bark. C) Multiple damaged areas within a stem. D) Stem broken by the combined effect of insect damage and wind.

**Table S1.** Metabolites with significant effect as a covariate on association models, and SNP-markers significantly associated with the presence of *S. calcarata* in stems.

| Metabolite                              | KEGG ID | Binbase ID | SNP            | p-value  | q-value    |
|-----------------------------------------|---------|------------|----------------|----------|------------|
| <i>Adipic acid</i>                      | C06104  | 218815     | Chr17_5374630  | 6.72E-07 | 0.42326004 |
|                                         |         |            | Chr17_5592339  | 1.25E-06 | 0.78467665 |
|                                         |         |            | Chr04_19461858 | 1.42E-06 | 0.89516486 |
|                                         |         |            | Chr10_17623737 | 1.70E-06 | 1          |
|                                         |         |            | Chr17_5592348  | 1.88E-06 | 1          |
| <i>Similar to gluconic acid lactone</i> | -       | 506931     | Chr10_17623737 | 6.44E-07 | 0.40580396 |
|                                         |         |            | Chr17_5592339  | 9.71E-07 | 0.61138533 |
|                                         |         |            | Chr17_5592348  | 1.82E-06 | 1          |
|                                         |         |            | Chr04_19461858 | 2.62E-06 | 1          |
|                                         |         |            | Chr19_2345511  | 2.81E-06 | 1          |
| <i>Similar to glucoheptonic acid</i>    | -       | 199205     | Chr10_17623737 | 5.96E-07 | 0.37523362 |
|                                         |         |            | Chr17_5592339  | 6.50E-07 | 0.40943862 |
|                                         |         |            | Chr17_5592348  | 1.20E-06 | 0.75839902 |
|                                         |         |            | Chr04_19461858 | 2.46E-06 | 1          |
|                                         |         |            | Chr19_2345511  | 2.56E-06 | 1          |
| <i>Similar to lactobionic acid</i>      | -       | 446842     | Chr10_17623737 | 3.61E-07 | 0.22727223 |
|                                         |         |            | Chr17_5592339  | 1.35E-06 | 0.85198592 |
|                                         |         |            | Chr04_19461858 | 2.46E-06 | 1          |
|                                         |         |            | Chr17_5592348  | 2.54E-06 | 1          |
|                                         |         |            | Chr19_2345511  | 2.81E-06 | 1          |

**Table S2.** General statistics for the presence of *S. calcarata* in the trial.

|                             | Number of trees | Attacked (%) | Non-attacked (%) |
|-----------------------------|-----------------|--------------|------------------|
| Block 1                     | 440             | 14.3         | 85.7             |
| Block 2                     | 436             | 15.6         | 84.4             |
| Block 3                     | 414             | 15.0         | 85.0             |
| <b><i>Average</i></b>       | <b>430</b>      | <b>15.0</b>  | <b>85.0</b>      |
| <b><i>Std.Dev.</i></b>      | <b>14.0</b>     | <b>0.6</b>   | <b>0.6</b>       |
| <b><i>Coef. of var.</i></b> | <b>3.3</b>      | <b>4.3</b>   | <b>0.8</b>       |
